# Supplementary material for: Telomere length and immunosuppression in non-idiopathic pulmonary fibrosis interstitial lung disease
Source: PubMed Central journal article supplement — Eur Respir J. 2023 Nov 30;62(5):2300441. doi: 10.1183/13993003.00441-2023 (PMC10695771; doi:10.1183/13993003.00441-2023), 2023-11-30

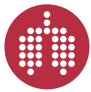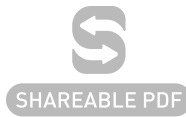

# Telomere length and immunosuppression in non-idiopathic pulmonary fibrosis interstitial lung disease

David Zhang <sup>1,9</sup>, Ayodeji Adegunsoye<sup>2,9</sup>, Justin M. Oldham<sup>3</sup>, Julia Kozlitina <sup>4</sup>, Nicole Garcia<sup>2</sup>, Maria Poonawalla<sup>2</sup>, Rachel Strykowski<sup>2</sup>, Angela L. Linderholm<sup>5</sup>, Brett Ley<sup>6</sup>, Shwu-Fan Ma<sup>7</sup>, Imre Noth<sup>7</sup>, Mary E. Strek<sup>2</sup>, Paul J. Wolters<sup>6</sup>, Christine Kim Garcia <sup>1</sup> and Chad A. Newton <sup>8</sup>

<sup>1</sup>Division of Pulmonary and Critical Care Medicine, Columbia University, New York, NY, USA. <sup>2</sup>Section of Pulmonary and Critical Care, Department of Medicine, University of Chicago, Chicago, IL, USA. <sup>3</sup>Division of Pulmonary and Critical Care Medicine, University of Michigan, Ann Arbor, MI, USA. <sup>4</sup>Eugene McDermott Center for Human Growth and Development, University of Texas Southwestern Medical Center, Dallas, TX, USA. <sup>5</sup>Division of Pulmonary, Critical Care, and Sleep Medicine, University of California Davis, Sacramento, CA, USA. <sup>6</sup>Division of Pulmonary, Allergy and Sleep Medicine, University of California San Francisco, San Francisco, CA, USA. <sup>7</sup>Division of Pulmonary and Critical Care Medicine, University of Virginia, Charlottesville, VA, USA. <sup>8</sup>Division of Pulmonary and Critical Care Medicine, University of Texas Southwestern Medical Center, Dallas, TX, USA. <sup>9</sup>These two authors contributed equally to this work.

Corresponding author: Chad A. Newton ([chad.newton@utsouthwestern.edu](mailto:chad.newton@utsouthwestern.edu))

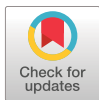

Shareable abstract (@ERSpublications)

**Fibrotic hypersensitivity pneumonitis and unclassifiable ILD patients who have age-adjusted leukocyte telomere length <10th percentile may experience reduced survival when exposed to immunosuppression, similar to IPF patients** <https://bit.ly/3DJJLYg>

**Cite this article as:** Zhang D, Adegunsoye A, Oldham JM, *et al.* Telomere length and immunosuppression in non-idiopathic pulmonary fibrosis interstitial lung disease. *Eur Respir J* 2023; 62: 2300441 [DOI: 10.1183/13993003.00441-2023].

This extracted version can be shared freely online.

Copyright ©The authors 2023.

This version is distributed under the terms of the Creative Commons Attribution Non-Commercial Licence 4.0. For commercial reproduction rights and permissions contact [permissions@ersnet.org](mailto:permissions@ersnet.org)

This article has an editorial commentary: <https://doi.org/10.1183/13993003.01852-2023>

Received: 13 March 2023  
Accepted: 26 July 2023

## Abstract

**Background** Studies suggest a harmful pharmacogenomic interaction exists between short leukocyte telomere length (LTL) and immunosuppressants in idiopathic pulmonary fibrosis (IPF). It remains unknown if a similar interaction exists in non-IPF interstitial lung disease (ILD).

**Methods** A retrospective, multicentre cohort analysis was performed in fibrotic hypersensitivity pneumonitis (fHP), unclassifiable ILD (uILD) and connective tissue disease (CTD)-ILD patients from five centres. LTL was measured by quantitative PCR for discovery and replication cohorts and expressed as age-adjusted percentiles of normal. Inverse probability of treatment weights based on propensity scores were used to assess the association between mycophenolate or azathioprine exposure and age-adjusted LTL on 2-year transplant-free survival using weighted Cox proportional hazards regression incorporating time-dependent immunosuppressant exposure.

**Results** The discovery and replication cohorts included 613 and 325 patients, respectively. In total, 40% of patients were exposed to immunosuppression and 22% had LTL <10th percentile of normal. fHP and uILD patients with LTL <10th percentile experienced reduced survival when exposed to either mycophenolate or azathioprine in the discovery cohort (mortality hazard ratio (HR) 4.97, 95% CI 2.26–10.92;  $p < 0.001$ ) and replication cohort (mortality HR 4.90, 95% CI 1.74–13.77;  $p = 0.003$ ). Immunosuppressant exposure was not associated with differential survival in patients with LTL  $\geq 10$ th percentile. There was a significant interaction between LTL <10th percentile and immunosuppressant exposure (discovery  $p_{\text{interaction}} = 0.013$ ; replication  $p_{\text{interaction}} = 0.011$ ). Low event rate and prevalence of LTL <10th percentile precluded subgroup analyses for CTD-ILD.

**Conclusion** Similar to IPF, fHP and uILD patients with age-adjusted LTL <10th percentile may experience reduced survival when exposed to immunosuppression.

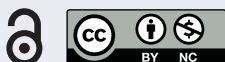

Supplement: ERJ-00441-2023.Shareable.pdf [file ERJ-00441-2023.Shareable.pdf]
